# Supplementary figures and images for: Defective mesenchymal Bmpr1a-mediated BMP signaling causes congenital pulmonary cysts
Source: eLife journal article supplement (doi:10.7554/elife.91876), 2023-11-22

B

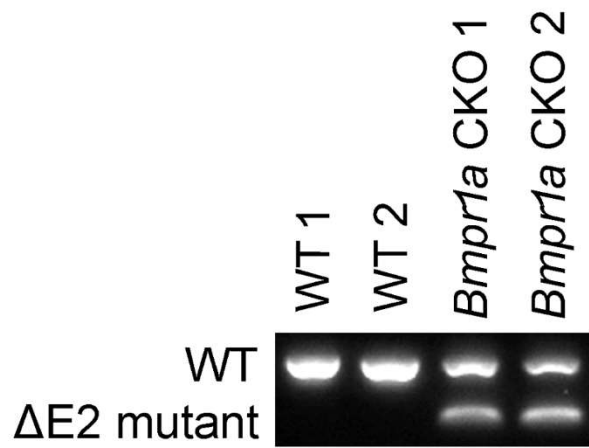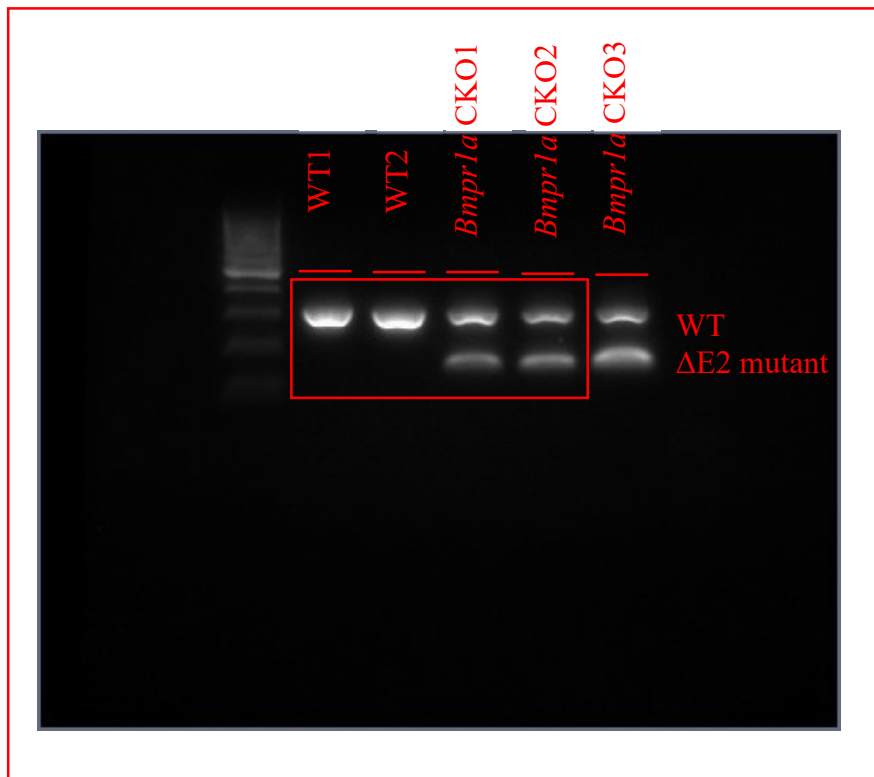

Figure 1-figure supplement 1

Supplement: fig1-figsupp1-data2 [file elife-91876-fig1-figsupp1-data2-v1.zip]

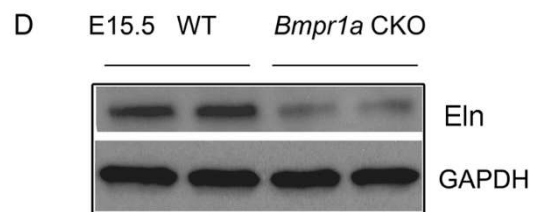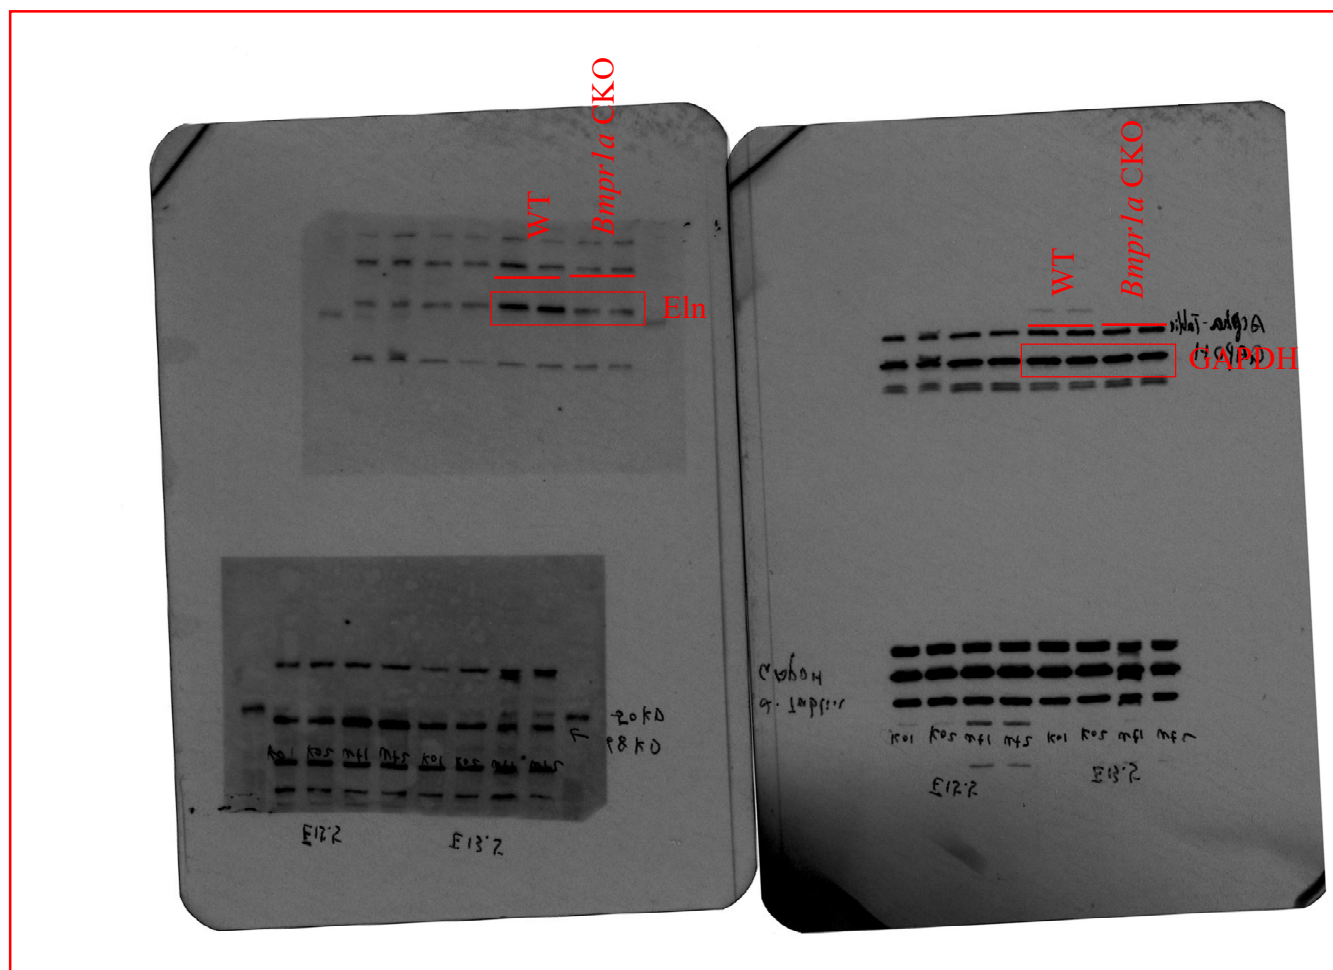

Figure 3

Supplement: fig3-data2 [file elife-91876-fig3-data2-v1.zip]

E

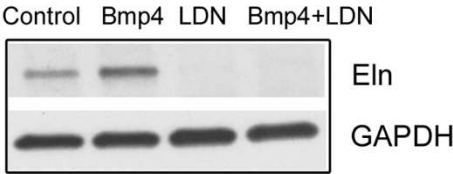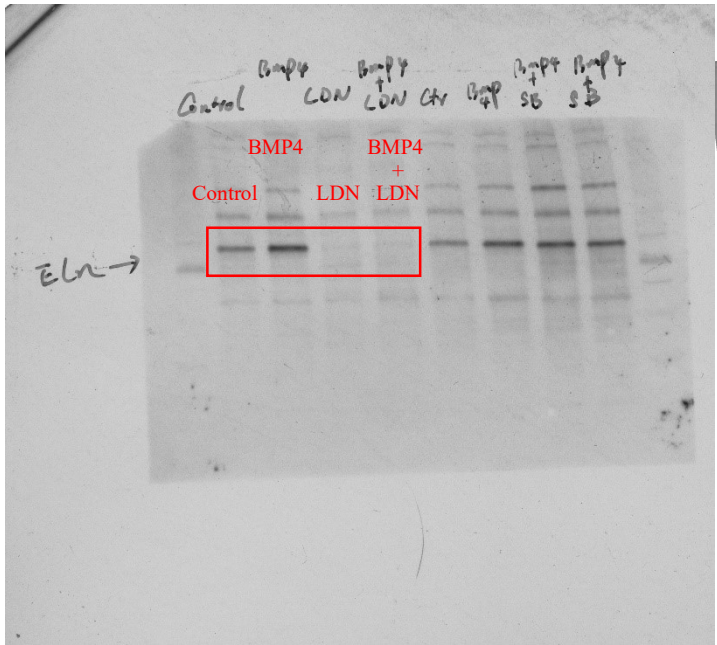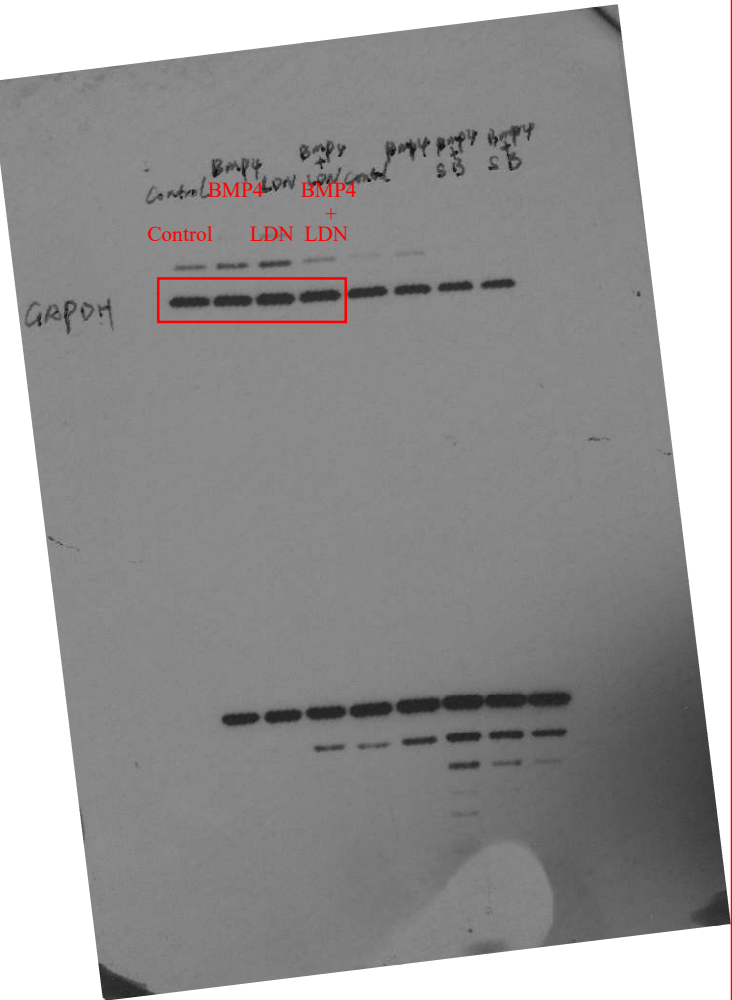

Figure 3

Supplement: fig3-data5 [file elife-91876-fig3-data5-v1.zip]

E

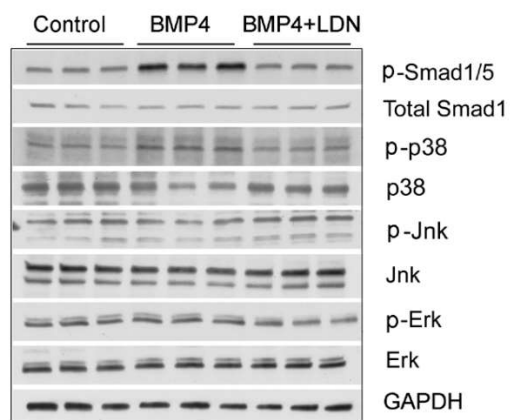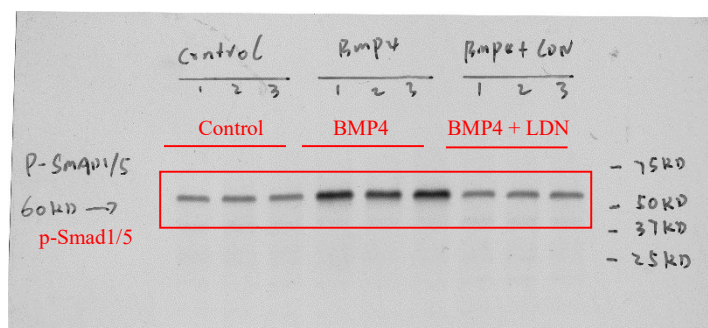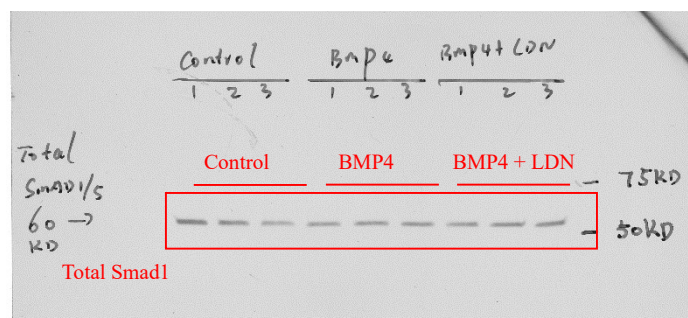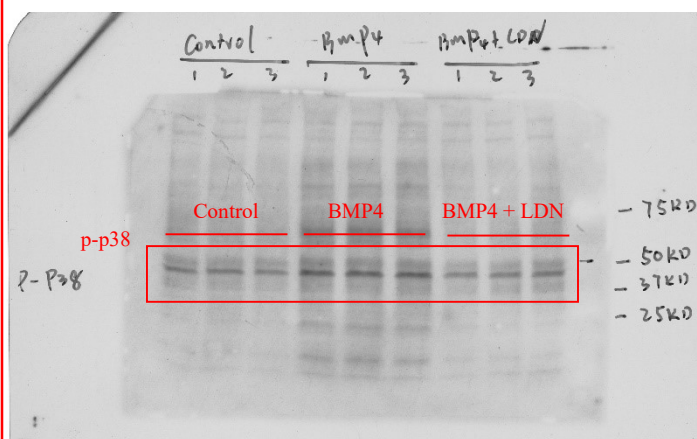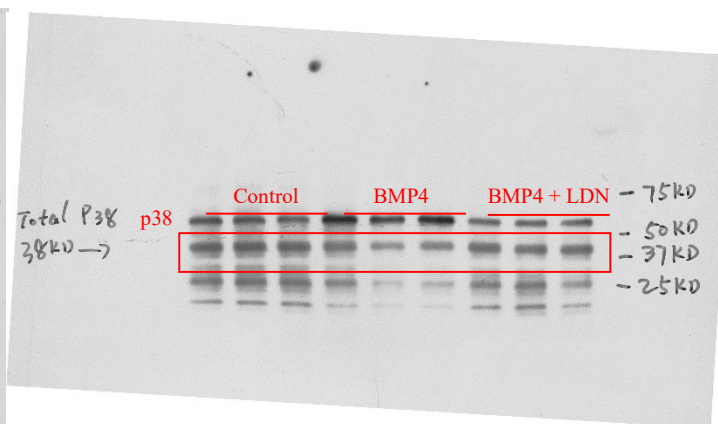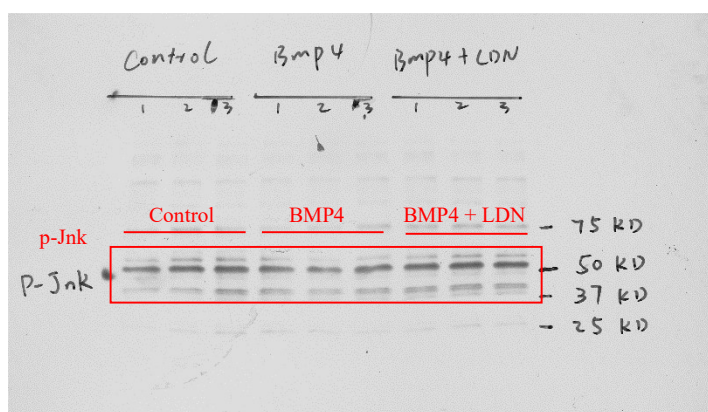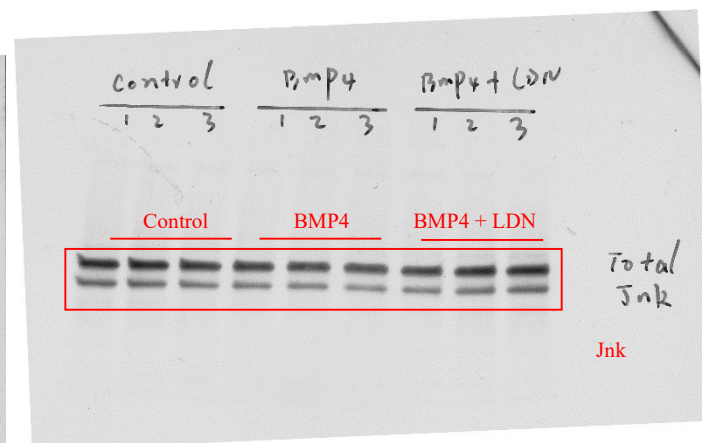

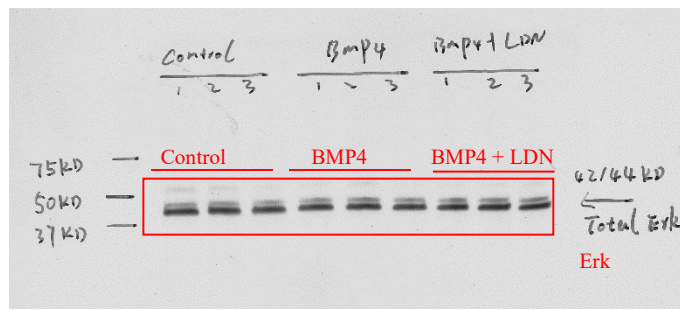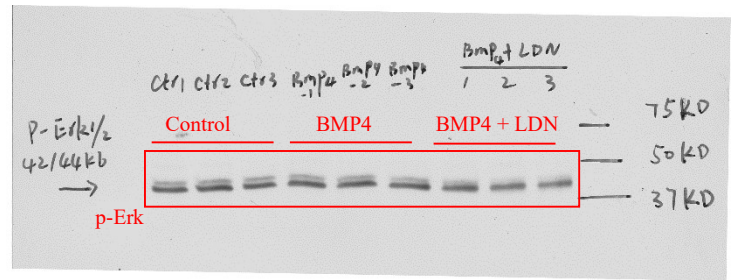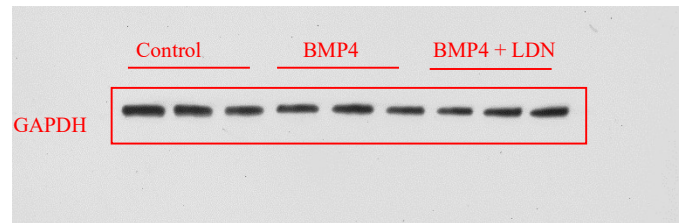

Figure 4

Supplement: fig4-data18 [file elife-91876-fig4-data18-v1.zip]

C

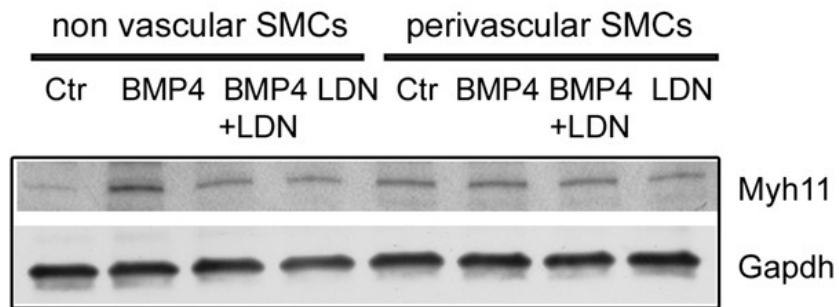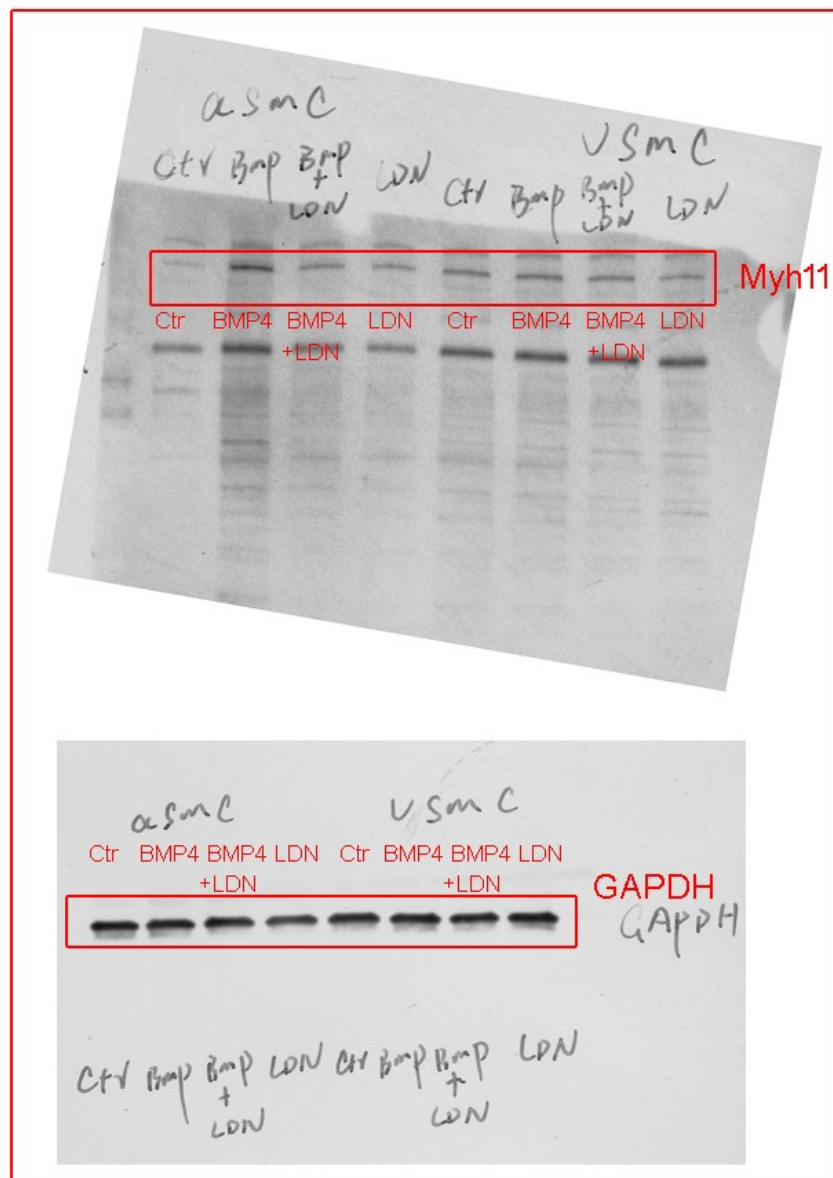

Figure 5

Supplement: fig5-data3 [file elife-91876-fig5-data3-v1.zip]

E

E15.5 MPCs

WT

*Bmpr1a* CKO

Bmp4

$\alpha$ -Tubulin

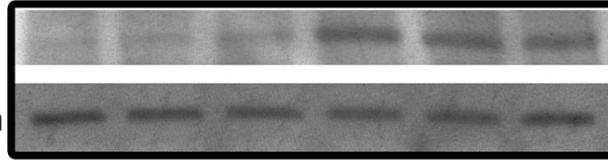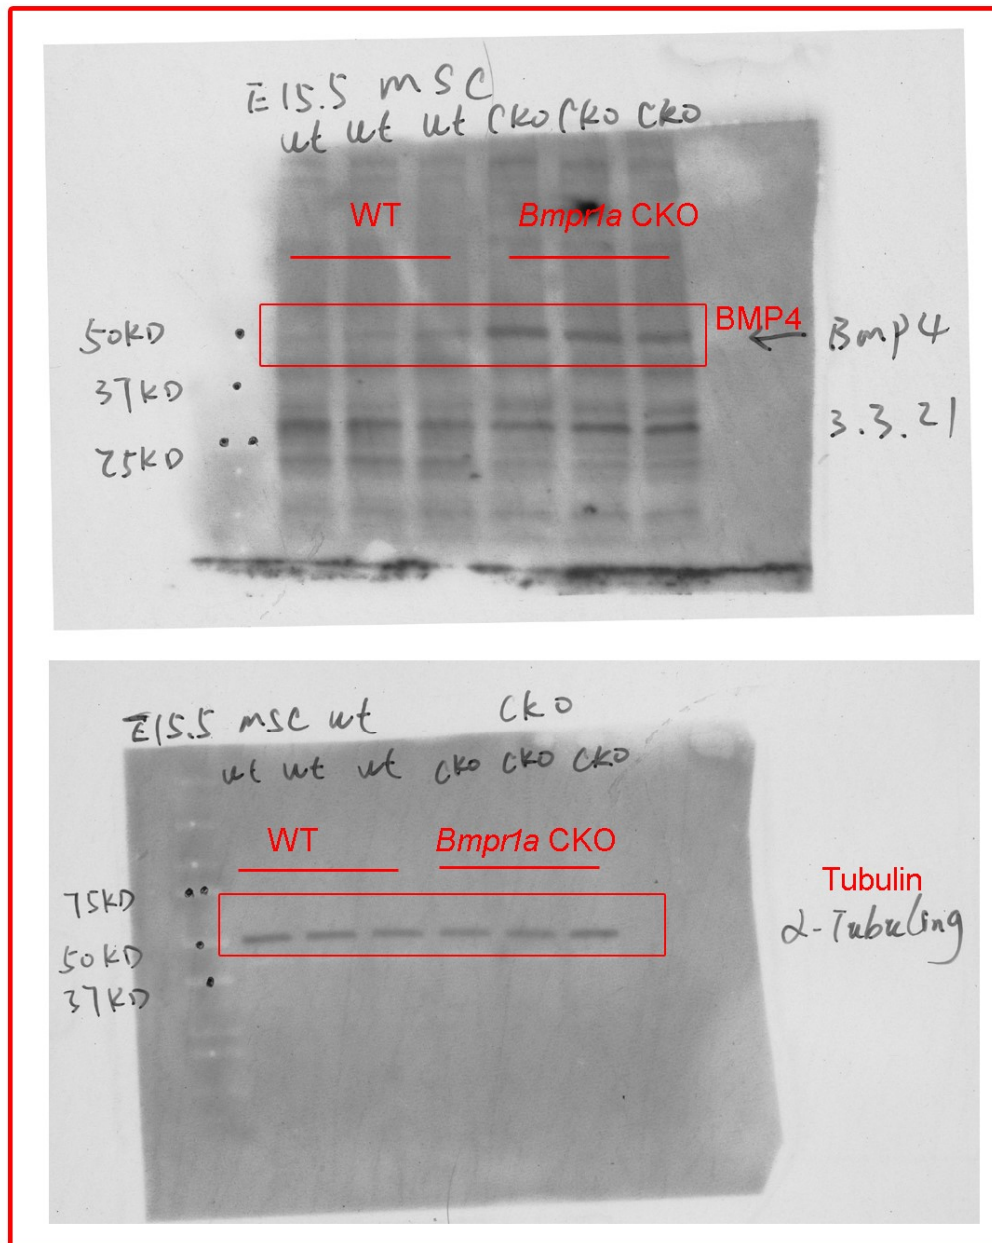

Figure 7

Supplement: fig7-data3 [file elife-91876-fig7-data3-v1.zip]
